## TARGETING OF AN EXPRESSED NEUROTOXIN BY ITS RECOMBINANT BACULOVIRUS

MENASHE ELAZAR, RAFI LEVI AND ELIAHU ZLOTKIN\*

*Department of Animal and Cell Biology, The Life Science Institute, The Hebrew University of Jerusalem, Jerusalem 91904, Israel*

\*Author for correspondence (e-mail: zlotkin@vms.huji.ac.il)

*Accepted 14 May 2001*

### Summary

AaIT, an insect-selective neurotoxic polypeptide derived from scorpion venom, has recently been used to engineer recombinant baculoviruses for insect pest control. Lepidopterous larvae infected with an AaIT-expressing baculovirus reveal symptoms of paralysis identical to those induced by injection of the native toxin. However, the paralyzed larvae treated by the recombinant virus possess an approximately 50-fold lower hemolymph toxin concentration than insects paralyzed by the native toxin. The mechanism of this potentiation effect was studied using immunocytochemistry, electrophysiology and toxicity assays. (i) Light microscopy, using peroxidase-conjugated antibodies, revealed the presence of toxin in virus-susceptible tissues, including tracheal epithelia located close to the central nervous system and beyond its lamellar enveloping sheath. (ii) High-resolution immunogold electron microscopical cytochemistry clearly revealed the presence of recombinant AaIT toxin inside

the thoracic and abdominal ganglia on neuronal cell bodies and axonal membranes. (iii) Ventral nerve cords dissected from silkworm larvae infected with the recombinant baculovirus exhibited a high degree of excitability, expressed as enhanced frequency and bursting mode of their spontaneous activity, when compared to nerve cords infected with the wild-type virus. We conclude that the recombinant-virus-infected tracheal epithelia, outbranching in the body of an infected insect, (i) locally supply a continuous, freshly produced toxin to its neuronal receptors and (ii) introduce the expressed toxin to the insect central nervous system, thus providing it with critical target sites that are inaccessible to the native toxin.

Key words: AaIT, CNS targeting, cooperativity, recombinant baculovirus, toxin potentiation.

### Introduction

*Androctonus australis* insect toxin (AaIT) is a single-chain neurotoxic polypeptide derived from the venom of the Buthid scorpion *Androctonus australis* Hector (Zlotkin et al., 1971b). It is composed of 70 amino acid residues cross-linked by four disulfide bridges (Darbon et al., 1982). The strict selectivity of AaIT for insects has been documented by toxicity, electrophysiological and ligand–receptor binding assays (Zlotkin et al., 1995). The latter have shown that various insect neuronal membranes possess a single class of non-interacting AaIT-binding sites of high affinity ( $K_D=1\text{--}3\text{ nmol l}^{-1}$ ) and low capacity ( $0.5\text{--}2.0\text{ pmol mg}^{-1}$  protein) (Gordon et al., 1984; Gordon et al., 1985). The fast excitatory paralysis induced by AaIT is a result of the induction of repetitive firing in the terminal branches of the insect motor nerves, resulting in a massive and uncoordinated stimulation of the respective skeletal muscles (Walther et al., 1976; Fishman et al., 1991). The neuronal repetitive activity is attributed to an exclusive and specific perturbation of sodium conductance (Pelhate and Zlotkin, 1981) as a consequence of toxin binding to external loops of the insect

voltage-dependent sodium channel and modification of its gating mechanism (Gordon et al., 1992).

Our purpose being strictly agrotechnical, a recombinant baculovirus encoding the AaIT gene was constructed for use in insect pest control. Lepidopterous larvae infected with an AaIT-expressing recombinant baculovirus (RV), when compared to a wild-type virus (WV), show a significant reduction of survival time and amount of host plant damage (Cory et al., 1994; Maeda et al., 1991; McCutchen et al., 1991; Stewart et al., 1991). The expressed toxin found in the hemolymph of the infected insect: (i) is chemically identical to the native toxin (McCutchen et al., 1991; Stewart et al., 1991), (ii) mimics the native toxin's symptoms of paralysis (McCutchen et al., 1991; Stewart et al., 1991), and (iii) requires a much lower hemolymph titer than the injected native toxin to induce a similar paralysis (Maeda et al., 1991; McCutchen et al., 1991; Table 1). The latter phenomenon, the enhanced effectiveness of the expressed toxin, is referred to as toxin potentiation.

Herrmann et al. (Herrmann et al., 1990; Herrmann et al.,

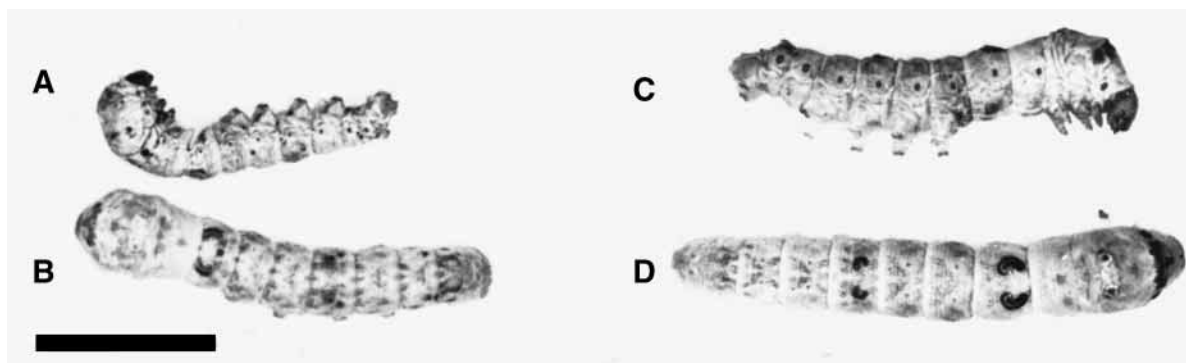

Fig. 1. Similarity of symptoms induced by the native toxin and by recombinant virus infection to silkworm larvae. The recombinant virus mimics the native toxin by inducing spasmodic contractions, progressive reduction of mobility and, finally, a complete paralysis in a contracted, shortened body shape (A,C); (A) paralyzed larva 5 h after injection of  $3 \mu\text{g } 100 \text{ mg}^{-1}$  body mass of AaIT; (B) larva injected with  $5 \mu\text{l}$  of distilled water as a control; (C) paralyzed larva 50 h.p.i. with  $10^5$  p.f.u. of the recombinant baculovirus, BmAaIT; (D) larva 50 h.p.i. with  $10^5$  p.f.u. of the wild-type BmM14 baculovirus. Scale bar, 1 cm.

1995) showed that the paralyzing doses ( $PD_{50}$ ) of injected AaIT for lepidopterous species such as the Egyptian cotton leafworm (*Spodoptera littoralis*) and tobacco budworm (*Heliothis virescens*) were 2.4 and  $2.5 \mu\text{g } 100 \text{ mg}^{-1}$  body mass, respectively. The onset of paralysis is indicated by spasmodic local contractions, which occur within 1 h of injection and progress to contraction of the body wall, which causes the larvae to shorten, and to complete immobility by 5–10 h postinjection (h.p.i.). Of special importance for the present study was the finding by McCutchen et al. (McCutchen et al., 1991) that if the toxin is delivered by oral infection with the recombinant baculovirus, paralysis is achieved while hemolymph concentrations are in the range  $1 \text{ ng } \mu\text{l}^{-1}$ , as compared to a mean concentration of  $70 \text{ ng } \mu\text{l}^{-1}$  at the  $PD_{50}$  for the injected toxin (Herrmann et al., 1995). As shown in Table 1, a similar potentiation was demonstrated in the present study in silkworm larvae infected with the recombinant *Bombyx mori* AaIT-expressing virus (BmAaIT). The present study examines the mechanism of this potentiation.

Preliminary observations revealed that infection with WV does not significantly affect the insect's susceptibility to injected native toxin (data not shown). Therefore the assumption that the above potentiation is a consequence of a pharmacokinetic, targeting, cooperativity between the RV and its expressed toxin provides the working hypothesis of the present study.

## Materials and methods

### Toxin

The insect selective excitatory neurotoxin, AaIT, was isolated and purified from the venom of the North African scorpion *Androctonus australis* Hector by molecular exclusion and ion-exchange chromatography, according to a published procedure (Zlotkin et al., 1971b).

### Baculovirus

Two kinds of genetically modified *Bombyx mori* nuclear

polyhedrosis baculoviruses (BmNPV), kindly provided by Prof. S. Maeda (Entomology, UC Davis, USA), were employed in the present study. The first was the strain designated BmM14, which is polyhedra deficient but mimics the pathology of WV when injected to silkworm larvae. The second was the recombinant virus BmAaIT (Maeda, 1989; Maeda et al., 1991).

### Experimental insects

Silkworm larvae *B. mori* were bred at  $28^\circ\text{C}$  on artificial diet according to the method of Marumoto et al. (Marumoto et al., 1987). Silkworm eggs were kindly provided by Katakura Industries (Tokyo, Japan). Larvae of the blowfly *Sarcophaga falculata* were bred in the laboratory.

### Toxicity assays

In order to monitor the toxicity of native and newly formed recombinant AaIT (Table 1), a sensitive assay that monitors a fast and transient paralysis (within seconds) of blowfly larvae, yielding the contraction paralysis unit (CPU) (Zlotkin et al., 1971a), was used. The second assay was aimed at quantifying the toxic potency of AaIT to silkworm larvae, monitoring the relatively slow, progressive paralysis process of Lepidopterous larvae (inability to move when mechanically stimulated or inability to turn to a normal position when inverted; see Fig. 1) yielding the paralytic unit ( $PD_{50}$ ) (Herrmann et al., 1990). Both assays are based on subcuticular injection ( $1\text{--}5 \mu\text{l}$  into the body cavity) and the 50 % end-point determination according to the method of Reed and Muench (Reed and Muench, 1938). 25–30 test animals were used per single assay. The blowfly larvae were observed for a response immediately following injection, while still mounted on the needle of the syringe (Hamilton, USA). Complete immobility in a contracted form lasting for about 5 s is considered as positive. The experimental silkworm larvae were placed in the standard artificial diet (see above) and observed for 24 h to determine the response.

### Antibody

Pre-immune serum was collected from rabbits and assayed

by dot blotting against AaIT, and gave a clear negative response. The rabbits were then immunized according to the method of Vaitukaitis (Vaitukaitis, 1981). AaIT (90–180 µg) was suspended in the solution of complete adjuvant in 0.1 % SDS to a final volume of 2 ml and injected subcutaneously at 15 points. Blood was collected after two applications. The specificity of the serum was tested by immune and western blots (data not shown) and with an assay of preincubation with toxin ('quenching'; see Fig. 2G).

#### Light microscopy

Fixation was performed by perfusion of 10 ml of fixative solution (0.5 % glutaraldehyde, 4 % paraformaldehyde, 5 % sucrose, 1 % picric acid, 0.05 %  $\text{CaCl}_2$  in 0.1 mol l<sup>-1</sup> cacodylate buffer, pH 7.4) through the body cavity of decapitated animals. This was followed by a dorsal cut through the insect's cuticle and fixation for 1 h at room temperature (22–25 °C). The ventral nerve cord (VNC) and fat body tissues were then dissected and exposed for an additional fixation in the cold (4 °C) for 24 h. At this stage fixative was supplemented with one drop of 30 %  $\text{H}_2\text{O}_2$  per 10 ml. Tissues were dehydrated in a series of ascending concentrations of ethanol and a final step of xylene and then embedded in Paraplast. Sections 10 µm thick from fat body, thoracic and abdominal ganglia were cut and mounted on gelatin-coated glass slides. Sections were subjected for immunocytochemistry using the VectaStain ABC kit (Vector laboratories, Inc. Burlingame, CA, USA) with avidin-conjugated secondary antibody and biotinylated horseradish peroxidase according to an attached protocol (Hsu et al., 1981). Visualization of bound antibody was achieved by incubation in 5 mg ml<sup>-1</sup> diaminobenzidine solution supplemented with 0.1 %  $\text{H}_2\text{O}_2$ .

#### Electron microscopy

VNCs for electron microscopy were processed as described for light microscopy, with the addition of a postfixation step using 1 %  $\text{OsO}_4$  for 45 min in the dark. Following the postfixation step, VNCs were dehydrated in a series of ascending concentrations of ethanol and embedded in Epon resin blocks. Ultra-thin sections (0.1 µm) obtained from thoracic and abdominal ganglia were collected on nickel grids. The post-embedding immunogold-labeling method was employed on the sections (using 12 nm diameter particles) (Castel et al., 1993). Following labeling, sections were stained with uranyl acetate and lead citrate and viewed using a Joel CX100 electron microscope.

#### Electrical recording

Dissection and processing of VNCs were performed, essentially, according to the method of Weeks and Truman (Weeks and Truman, 1984). Briefly, silkworm larvae were immobilized by cooling, opened along the dorsal midline and pinned upright on a wax block. The gut, fat body and entire body wall were removed. The intact VNC was bathed with saline consisting of (in mmol l<sup>-1</sup>): NaCl 6.5, KCl 33.5,  $\text{MgCl}_2$  16.2,  $\text{CaCl}_2$  13.6, dextrose 166.5,  $\text{KHCO}_3$  1.25,  $\text{KH}_2\text{PO}_4$  1.25,

buffered to pH 6.2. Extracellular recordings were made using Teflon pulled-suction electrodes from the connective between the 6<sup>th</sup> and the 7<sup>th</sup> abdominal ganglia. Spontaneous activity was amplified with an RC-coupled amplifier (Grass P-15). Data were displayed on a multiple trace storage oscilloscope and stored on a video recorder (Neurocorder, DR-886), with a frequency response of 0–20 kHz. The data were later digitized and analyzed on a 486 PC equipped with Computerscope software (Computerscope, R.C. Electronics, Santa Barbara, CA, USA) and then exported as spreadsheet files for further analysis.

## Results

### Potentiation

The increased effectivity of the virally expressed recombinant AaIT when compared to injected native toxin in tobacco budworm larvae (McCutchen et al., 1991; Herrmann et al., 1995; see Introduction) was reexamined in the present study using silkworm larvae infected by recombinant virus BmAaIT or injected with the native toxin (Table 1). The results show that the comparison of recombinant and native toxin titers in the hemolymph of the paralyzed larvae (both assessed by an identical bioassay, based on the contraction paralysis of blowfly larvae; see Materials and methods and Zlotkin et al., 1971a) reveals a 35-fold potentiation. A possible effect of the hemolymph medium on toxin activity was excluded by confirming that incubation of the toxin in silkworm hemolymph rather than saline did not affect the toxin (data not shown). Identical information was previously obtained with *Spodoptera* hemolymph (Herrmann et al., 1990).

### Histopathology

The histology of tracheal epithelium and fat body from insects infected with the RV BmAaIT was compared to those of WV and mock-infected insects. The infected insects have a characteristic histopathology of hypertrophied cells with

Table 1. Hemolymph concentration of recombinant or native AaIT toxin in paralyzed silkworm larvae

| Injection of native AaIT (ng µl <sup>-1</sup> ) | Infection by BmAaIT <sup>1</sup> (ng µl <sup>-1</sup> ) | Potentiation (fold) |
|-------------------------------------------------|---------------------------------------------------------|---------------------|
| 45±6.75                                         | 1.3±0.26                                                | 35                  |

BmAaIT, *Bombyx mori* AaIT-expressing virus.

Samples of hemolymph were collected from several paralyzed larvae by cutting an abdominal leg. Hemolymph was diluted in saline (0.65%) and the  $PD_{50}$  value of the diluted hemolymph was measured by the contraction paralysis assay on *Sarcophaga* larvae (see Materials and methods; Zlotkin et al., 1971a) and translated to toxin mass on the basis of its preliminary calibration in the presence of silkworm hemolymph (see text).

<sup>1</sup>Fourth-instar larvae were infected by injection of 10<sup>5</sup> plaque-forming units of BmAaIT virus.

Values are means ± S.D., *N*=3.



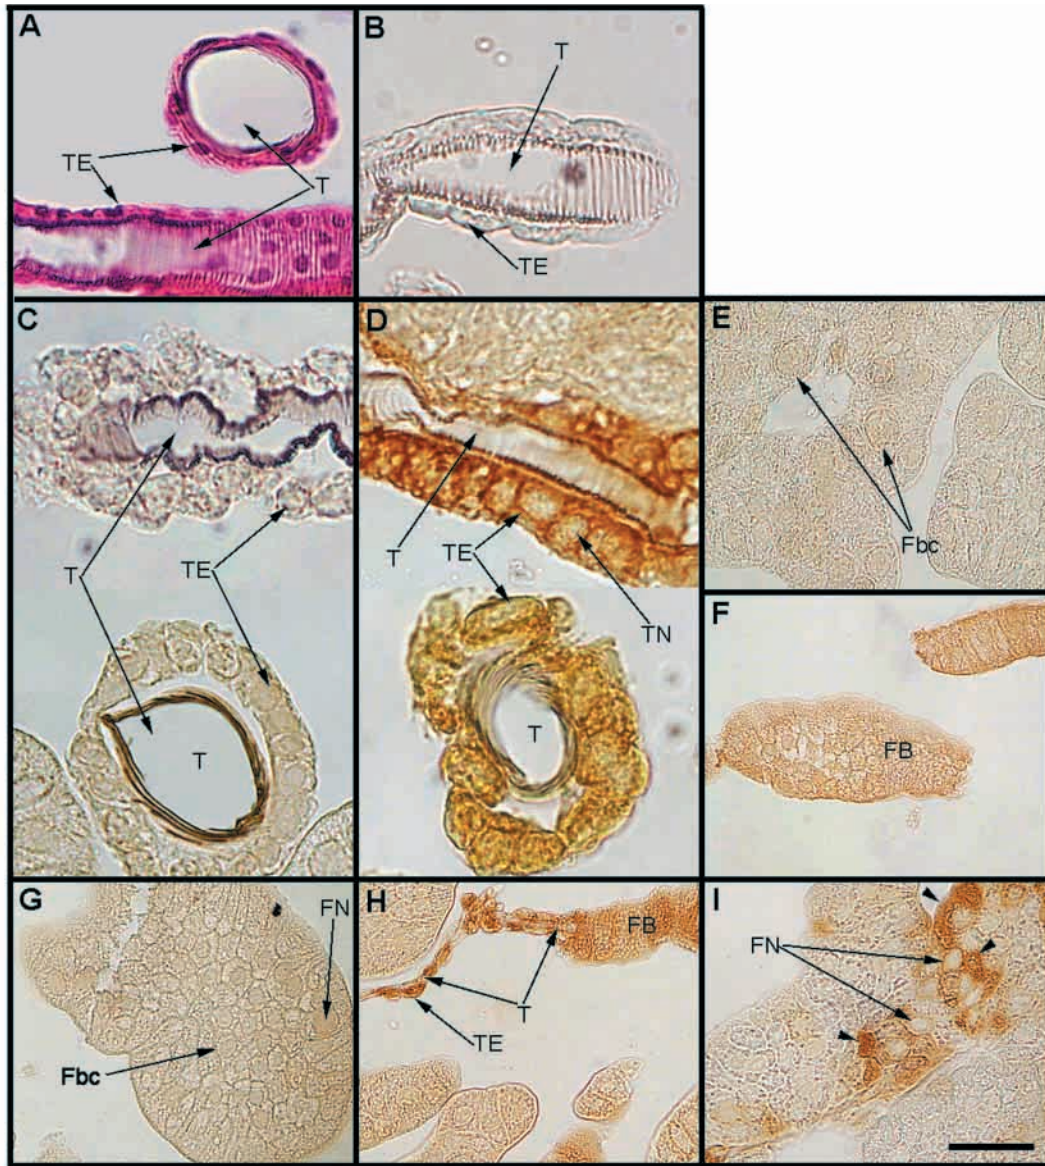

Fig. 2. Healthy and baculovirus-infected tracheal epithelium and fat body of silkworm larvae. Fourth instar silkworm larvae were infected with  $10^5$  p.f.u. of RV or WV, or were mock-infected ( $H_2O$  injection). At 50 h.p.i., when RV-infected insects were fully paralyzed, insect tissues were processed for immunocytochemistry as described in Material and methods. (A) Typical trachea (T) from mock-infected larvae stained with Hematoxylin and Eosin. (B) Typical trachea from mock-infected larvae stained with the AaIT-specific immunoperoxidase (see Materials and methods). (C) Trachea from WV (BmM14)-infected larvae 50 h.p.i. Notice the hypertrophied tracheal epithelium (TE) (compared with A and B). (D) Trachea from RV (BmM14)-infected and paralyzed larvae expressing AaIT at 50 h.p.i. The expressed toxin, indicated by the brown pigmentation, is shown in the cytoplasm of tracheal epithelial cells. The swollen nuclei (TN) are devoid of the toxin. (E) Fat body of WV (BmM14)-infected larvae. Notice the swollen nuclei of the fat body cells (Fbc). (F) Fat body from non-infected larva paralyzed by injection ( $1.6 \mu\text{g } 100 \text{ mg}^{-1}$ ) of AaIT. (G) Fat body from larva 50 h.p.i. by the RV, which was incubated with a serum that was quenched with  $50 \mu\text{g}$  AaIT for 2 h and is devoid of the AaIT-specific antibodies. (H, I) Fat body from RV (BmM14)-infected and paralyzed larvae expressing AaIT (arrowheads) at 50 h.p.i. Notice the swollen fat body nuclei (FN) that are devoid of toxin staining. Scale bar,  $20 \mu\text{m}$  (A–D) and  $50 \mu\text{m}$  (E–I).

swollen nuclei (Fig. 2C–E). Immunocytochemistry confirmed the expression of AaIT in RV-infected cells (Fig. 2D,H,I). These findings are in accordance with early histopathology examinations of lepidopterous larvae infected by baculoviruses (Harpaz and Zlotkin, 1965; Tanada and Kaya, 1993) showing that hemocytes, tracheal epithelium, epidermis and fat body comprise the virus-susceptible tissues, which are responsible

for its systemic distribution in the body and its mass production.

#### *Recombinant toxin in the CNS*

Fig. 3 provides microscopical evidence for the presence of the recombinant toxin in the CNS of the infected insect. The protective neural sheath of the VNC is composed of two layers,



Fig. 3. Recombinant AaIT in close vicinity to the CNS. Fourth instar silkworm larvae infected with  $10^5$  p.f.u. of the RV (fully paralyzed; A,B) or WV (F) were processed as described in Materials and methods at 50 h.p.i. (A) Section through an abdominal ganglion of RV-infected and paralyzed larvae showing the different regions of the ganglion, including the protective sheath composed of the neural lamella (NL) and the perineurium (PR) and the inner part, the neuropile (NP). Note the large trachea (T), which is an integral part of the neural lamella, and its epithelial cells (TE), filled with the recombinant toxin. (B) Small trachea (T) embedded within the neural lamella of the ganglion. The trachea is located at the site where the connective (C) attaches to the ganglion. Arrowheads indicate tracheal epithelial cells embedded in the neural lamella and show the presence of a recombinant AaIT. (C) An abdominal ganglion from a healthy larva fixed after being paralyzed by an injection of  $3 \mu\text{g } 100 \text{ mg}^{-1}$  body mass of AaIT. The dissected CNS was processed for immunohistochemistry (see E). The ganglion is devoid of any immunochemically detectable AaIT. (D) A ganglion derived from a larva that was orally infected by the wild-type virus BmNPV (1000 PBIs) and paralyzed by injection of  $2 \mu\text{g } 100 \text{ mg}^{-1}$  body mass of AaIT 48 h.p.i. The larva was fixed 6 h after injection, at a stage of advanced paralysis, and its CNS dissected and processed for LM immunohistochemistry (see Materials and methods).  $10 \mu\text{m}$  thick sections were incubated with the AaIT antibody. (E) An inset from the peripheral segment of the ganglion boxed in D, close to the connective (C) branching site. The ganglion is devoid of any immunochemically detectable traces of AaIT. Peripheral tracheae (T) are surrounded by viral inclusion bodies (polh), indicating an advanced stage of infection. The injected toxin was not detected. (F) Transverse section through an abdominal ganglion of a WV-infected insect at 50 h.p.i. Similar to A and B, the infection by WV reveals the location of small trachea (T) surrounded by the typically swollen epithelial cells (TE). G, inner part of the ganglion. Scale bar,  $40 \mu\text{m}$  (A,C,D,F);  $20 \mu\text{m}$  (B) and  $25 \mu\text{m}$  (C).

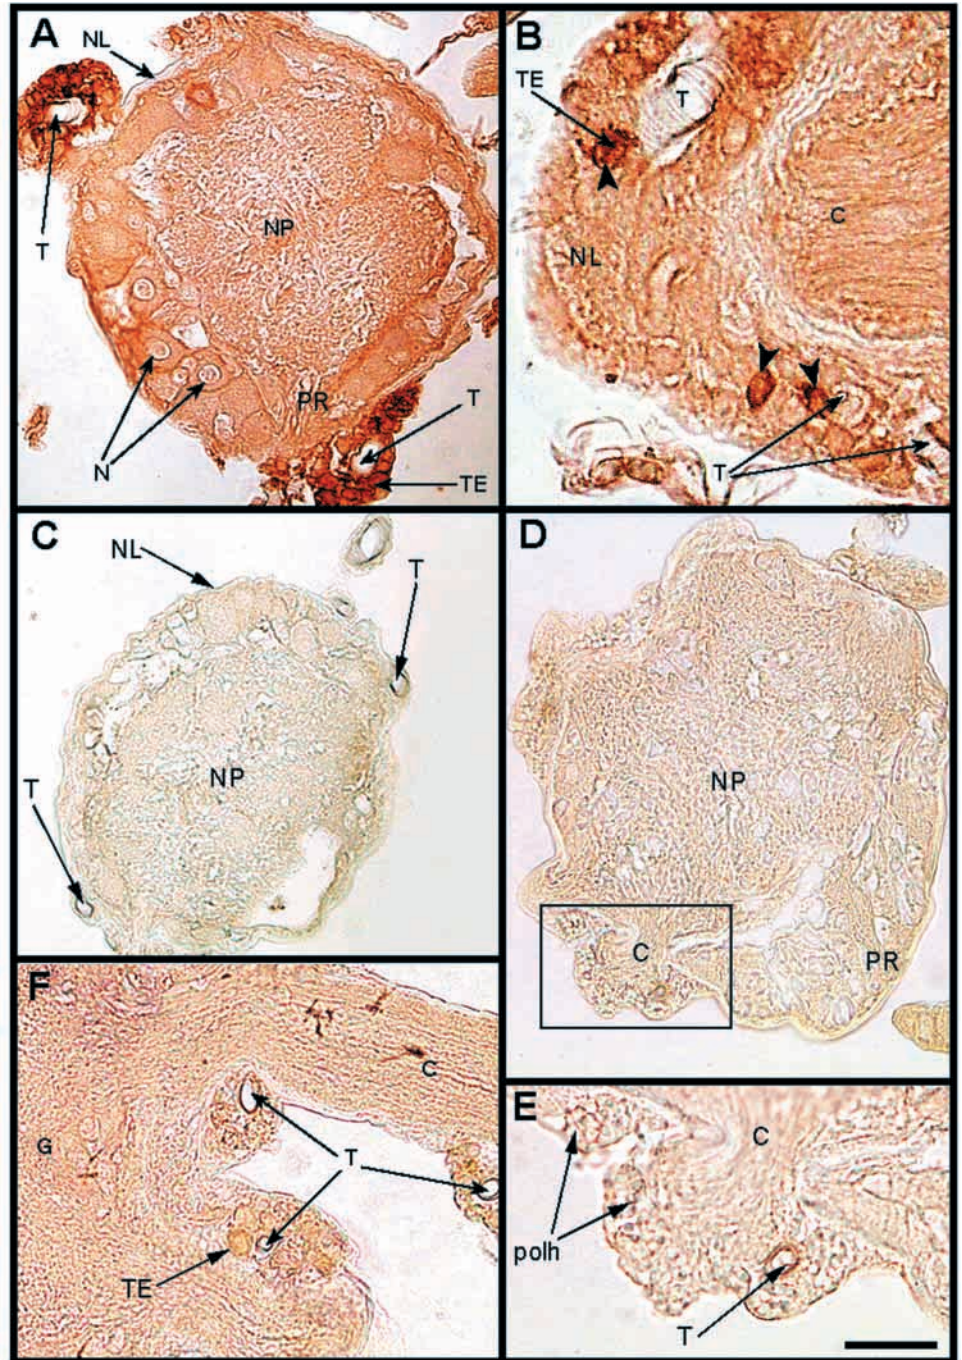

the acellular, collagenous neural lamella and the cellular perineurium, composed substantially of glial cells (Lane, 1974). Both layers are heavily tracheolated (Lane, 1974; Rothschild et al., 1986). Thus, the tracheal system surrounding the VNC is an integral part of the neural protective sheath. This aspect is demonstrated in Fig. 3B, which shows that the acellular neural lamella is enveloping the tracheae. Thus the anatomical and immunocytochemical information presented in

Fig. 3 suggests that the recombinant baculovirus provides the expressed toxin to the ventral nerve cord (VNC) by simply infecting the tracheal system located in the protective neural sheath. However, since the insect respiratory system is based on a separate supply of tracheae to individual cells, including centrally allocated neurons, the entire CNS is readily accessible to the recombinant toxin, as exemplified in Fig. 4, showing the presence of the recombinant toxin in the various



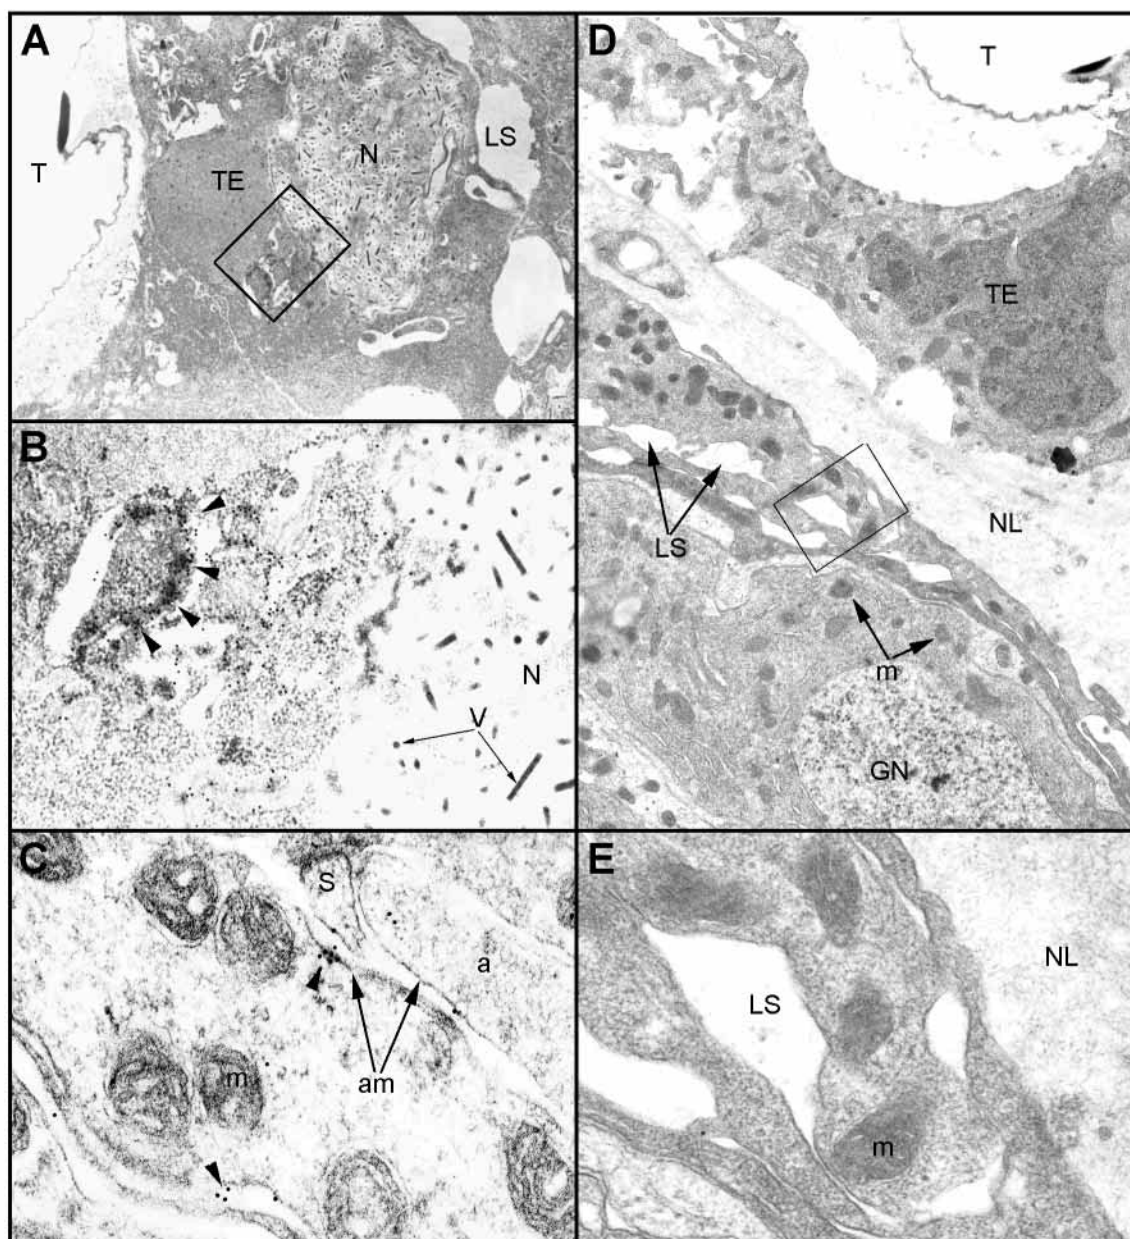

Fig. 4. Recombinant toxin inside an abdominal ganglion of the ventral nerve cord of silkworm larvae. The recombinant toxin is visualized by the immunogold method. (A) Tracheal epithelial cell (TE) in the ganglion beyond the neural lamella. (B) Magnification of the boxed area in A showing the massive expression of the toxin (arrowheads) in the epithelial cell in close vicinity to the nucleus (N). Note the viral particles (V) within the nucleus. (C) The toxin in the neuropile region of an abdominal ganglion (arrowheads). The presence of the toxin on the axonal membrane (am) in the neuropile is obvious. (D) Section from a ganglion in close vicinity to a tracheal cell at the perineural region from a healthy silkworm larva paralyzed by injection of an overdose ( $3 \mu\text{g } 100 \text{ mg}^{-1}$  body mass) of AaIT and visualised with immunogold labeling (see Materials and methods). (E) High magnification of the boxed area in D, where the injected AaIT was undetectable (compare to B). A, axon; am, axonal membrane; m, mitochondria; N, nucleus; s, synapse; TE, tracheal epithelium; V, viral particle; NL, neural lamella; LS, glial lacunar system. Scale bar,  $2 \mu\text{m}$  (A),  $0.35 \mu\text{m}$  (B,E),  $0.25 \mu\text{m}$  (C) and  $1.5 \mu\text{m}$  (D).

cellular elements of the CNS ganglia beyond the neural lamella, including a tracheal cell (Fig. 4A,B) and axonal membranes in the neuropile region (Fig. 4C).

Since the focus of this study was to define the difference between injected and virally produced AaIT it is essential to demonstrate that the injected toxin is not accessible to the CNS.

This aspect has in fact been demonstrated in a series of control experiments, namely (i) demonstration of the specificity of the primary antibody (see Fig. 2G); (ii) absence of the injected AaIT in either peripheral (Fig. 2F) or CNS-allocated tissues (Fig. 3C–E and Fig. 4D,E) in healthy larvae (Fig. 3C, Fig. 4D,E) as well as in larvae infected by the wild-type virus (Fig. 3D,E).

Fig. 5. Spontaneous electrical activity in the VNCs of virus-infected silkworm larvae. The insects were infected with  $10^5$  p.f.u. and, at the indicated times post-infection, were dissected to yield intact VNCs and bathed in saline. The RV-infected larvae revealed either a partial paralysis (slow mobility, spasmodic local contractions of the integument at 40–45 h.p.i.) or full paralysis (in contracted body shape, as in Fig. 1, at 45–52 h.p.i.). Extracellular recording was performed using a suction electrode between the 6<sup>th</sup> and 7<sup>th</sup> abdominal ganglion and data were collected during 5 min of continuous recording. (A) Frequency analyses in the form of inter-spike interval (ISI) distribution histograms for individual insects were averaged and median ISI values were calculated (arrows). The total number of spikes recorded from the RV-infected VNC when compared to the WV were  $9888 \pm 1646$  ( $N=5$ ) and  $5141 \pm 855$  ( $N=6$ ), respectively, at 40–45 h.p.i. and  $11485 \pm 1075$  ( $N=7$ ) and  $5112 \pm 633$  ( $N=3$ ), respectively, at 45–52 h.p.i. (B) A representative spontaneous electrical activity recorded from an RV- (upper trace) or WV-infected (lower trace) VNC. Notice the occurrence of bursts (underlined) in the recording from RV-infected (upper trace) insects at 50 h.p.i. when compared to the homogeneous-scattered pattern of activity recorded from WV-infected insects at 50 h.p.i. (lower trace). For technical reasons the amplitudes in such extracellular recordings are of no functional significance.

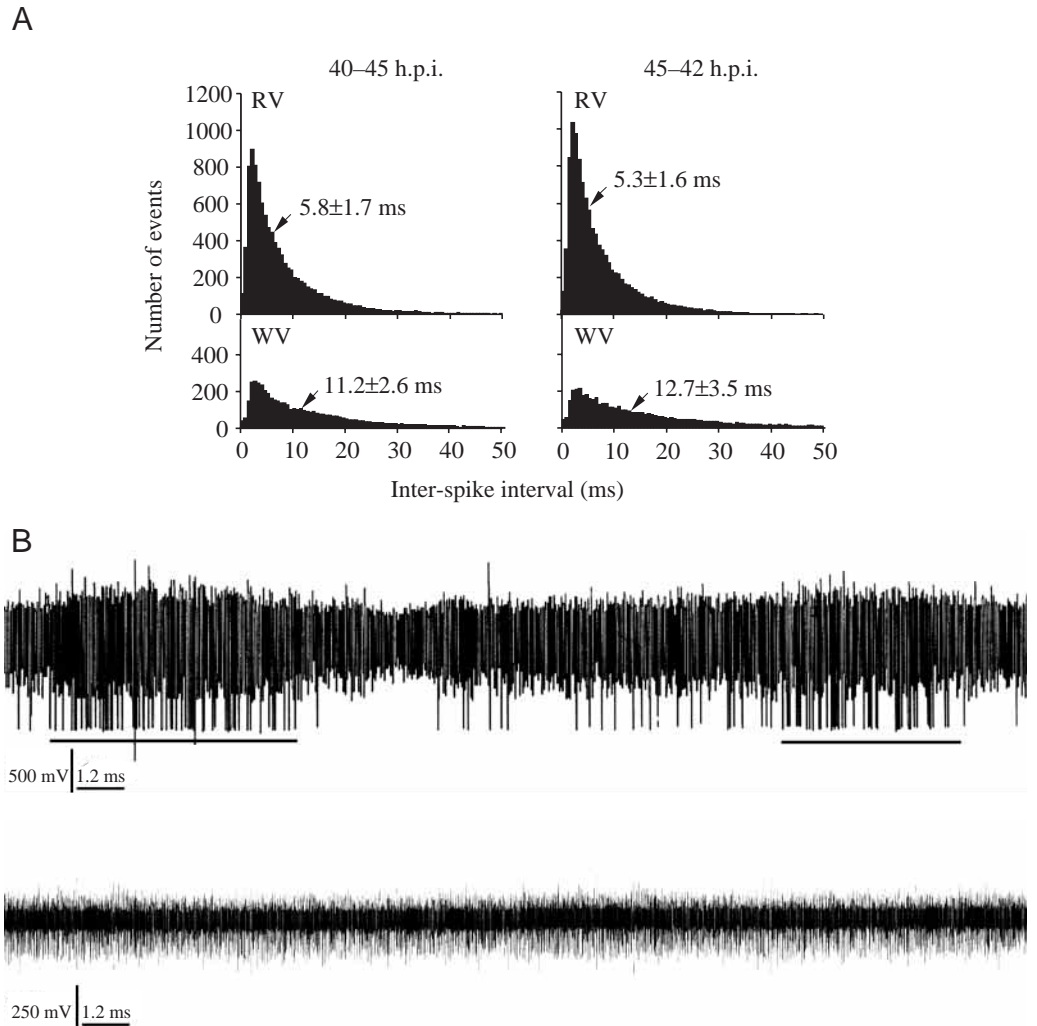

#### *Increased excitability of the CNS*

The endogenous (spontaneous) electrical activity of an isolated VNC has been used in the past for behavioral (Roeder et al., 1960) and pharmacological (Neri et al., 1965) studies. In the present work we took advantage of the availability and technical simplicity of the above preparation. Our approach was based on the expectation that the presence of the recombinant toxin in the insect CNS should augment its excitability revealed by the increase of the extracellularly recorded spontaneous electrical activity. As shown below, this expectation was verified.

In these assays, four experimental groups of silkworm larvae each infected with  $10^5$  plaque-forming units (p.f.u.) were used: WV infected, which were examined at 40–45 and 45–52 h post-infection (h.p.i.), both demonstrating normal mobility; and RV infected, examined at 40–45 h.p.i., revealing a slow motion and local spasmodic tremors, and at 45–52 h.p.i., when larvae were fully paralyzed in a contracted form (Fig. 1). The spontaneous

electrical activity (see Materials and methods) was recorded from the VNC of each experimental insect continuously for 5 min and analyzed by monitoring firstly, the inter-spike interval (ISI) (Fig. 5A) and secondly, the pattern of neuronal activity (namely the bursting characteristics) (Fig. 5B, Table 2). The RV has two main effects on the spontaneous electrical activity of the VNC. First there is an increase in the total number of the recorded electrical events (which was positively correlated to the degree of paralysis, Fig. 5A) and the reduction of the ISI median value, indicating an increase in the average frequency. Secondly, by changing the pattern of the electrical activity, from a random mode (as revealed by the WV infected VNC, Fig. 5B, lower trace) to a bursting mode in the RV infected insects (Table 2; Fig. 5B, upper trace). The bursting pattern has obtained two forms: more frequent bursts of short duration in the partially paralyzed insects and a low rate of bursts of longer duration, in the fully paralyzed insects (Table 2). In other words about 30 % of the recording time the

Table 2. *The bursting nature of the spontaneous electrical activity recorded from VNCs derived from baculovirus infected silkworm larvae*

| Treatment and time (h.p.i.) | Burst duration (ms) (mean $\pm$ S.D.) | Burst frequency (bursts min <sup>-1</sup> ) (mean $\pm$ S.D.) | Calculated duration of bursting activity (% of time) |
|-----------------------------|---------------------------------------|---------------------------------------------------------------|------------------------------------------------------|
| WV 40–52 (N=9)              | 272 $\pm$ 53                          | 1.66 $\pm$ 2.06                                               | 0.8                                                  |
| RV 40–45 (N=5)              | 308 $\pm$ 131                         | 24.5 $\pm$ 9.06                                               | 12.5                                                 |
| RV 45–52 (N=7)              | 2838 $\pm$ 2500                       | 5.6 $\pm$ 3.43                                                | 26.0                                                 |

Bursts were counted manually based on visual (using an oscilloscope with slow time base) and audio monitoring.

Burst duration is the average of at least three bursts from WV-treated VNCs and ten bursts from RV-treated VNCs.

Burst frequency is the total number of bursts counted, divided by the recording time (5 min). Duration was calculated by multiplying the average burst frequency with the average burst duration divided by the recording time (5 min) and normalized to percentage.

VNC of RV infected, fully paralyzed, larvae is under a bursting mode of activity when compared to 1 % of bursting activity in non-paralyzed, freely mobile, WV-infected insect (Table 2).

### Discussion

The choice of experimental approach for clarification of the RV-mediated potentiation phenomenon was directed by two pieces of previous information concerning the mechanism of AaIT-induced insect paralysis and AaIT-directed insect tolerance.

In the past a combination of electrophysiology (Walther et al., 1976) and microscopic autoradiography (Fishman et al., 1991) showed that the excitatory paralysis induced by AaIT is a consequence of a peripheral presynaptic effect on the neuromuscular junction. By the same methods it was shown that the VNC of cockroaches (D'Ajello et al., 1972; Fishman et al., 1991) and lepidopterous larvae (Herrmann et al., 1990) are impermeable to AaIT. However, once accessibility is experimentally provided by mechanical desheathing, AaIT is able to specifically bind to its receptors in the CNS (Fishman et al., 1991; Gordon et al., 1984; Gordon et al., 1985) and induce its typical repetitive firing (Pelhate and Zlotkin, 1981; Pelhate and Zlotkin, 1982). It was previously shown that the relative tolerance of lepidopterous larvae to AaIT is based on a combination of two separate factors. Firstly, there are difficulties of accessibility and availability ('pharmacokinetic'), due to impermeability of the terminal motor branches and its degradation and elimination processes (Herrmann et al., 1990). Secondly, the lepidopteran receptor for AaIT binds the toxin more weakly, with a dissociation constant of the order of seconds, than that of highly susceptible insects such as the blowfly, which has a dissociation constant of the order of minutes (Fishman et al., 1997).

This tolerance mechanism, based on a combination of factors including metabolic inactivation, accessibility

problems and lability of the toxin-receptor complex (see Introduction), may be countered by a continuous supply of newly produced toxin in close proximity to its target sites. The present study reveals that the recombinant baculovirus serves as a local supplier of AaIT at a cellular distance from its natural target sites.

The second role that the RV fulfills in potentiating its expressed toxin is by providing the toxin with new critical, CNS-localized, target sites (Fig. 3, Fig. 4), which are inaccessible to the toxin through the natural route of scorpion envenomation. The functional significance of the virus-mediated presence of the recombinant toxin in the insects CNS was provided by the data in Fig. 5 and Table 2. These results indicate firstly, an increase in the spontaneous electrical activity (Fig. 5A) and secondly, its shift from a random mode such as occurs in the WV-infected VNC, to a bursting mode of electrical activity occurring in the RV-infected VNCs. However, since there is a small bursting component in the spontaneous activity in control animals (Table 2) the above stated homogeneous-scattered form should rather be termed 'pseudorandom'. Both phenomena (the increase in frequency and the bursting) are correlated with the degree of paralysis (Table 2). We assume that the increased excitability of the infected VNCs is a reflection of the well-known action of AaIT on the voltage-gated sodium conductance (Pelhate and Zlotkin, 1981; Pelhate and Zlotkin, 1982; Walther et al., 1976).

The similarity in the symptoms of paralysis revealed by toxin-injected and RV-infected larvae (Fig. 1) follows from a presynaptic activation of skeletal muscles induced by AaIT (Walther et al., 1976). Thus, one can expect the same symptoms of paralysis regardless of whether the motor nerve is activated at its ganglionic segment or at the terminal branches. It is also noteworthy that the mechanism, which enables the recombinant toxin to affect the CNS, should similarly amplify its peripheral action.

The next question refers to the manner by which the RV translocates its expressed toxin. This question is related to the process of systemic host infection produced by the budded form of a baculovirus. Engelhard et al. (Engelhard et al., 1994), employing *Autographa californica* multiple nuclear polyhedrosis virus (AcMNPV) containing a *lacZ* reporter gene, revealed that the major conduit for viral systemic infection, enabling its rapid spreading throughout the host insect, is supplied not by the hemocytes, but rather by the tracheal system, which is also accessible to external infection (Kirkpatrick et al., 1994). The latter conclusion was supported by a more recent study using a recombinant baculovirus expressing the green fluorescence protein (Barrett et al., 1998). The suitability of the tracheal system to guide the recombinant virus and its expressed neurotoxin follows from the fact that: (i) the tracheal system is distributed among the various tissues, is intimately associated with individual cells and is flexibly expanding and adapting itself to the growing organism by the aid of the tracheoblasts; (ii) the tracheoblasts cross the tissue-protective extracellular matrices (basal lamina), allowing the infecting virions to circumvent these barriers (Engelhard et al., 1994); (iii) the tracheal epidermis



forms a kind of syncytial continuity, enabling the virus to spread rapidly (Engelhard et al., 1994).

The data presented in Fig. 3 and Fig. 4 show the role that the infected tracheal system fulfills in distributing the recombinant toxin. This is revealed by the massive presence of the toxin in and around the infected tracheal epithelial cells in the periphery and inside the VNC. Thus the presence of the recombinant toxin in the neuropilar part of the ganglia (Fig. 4C) can be similarly attributed to tracheal ramification of the CNS.

To summarize, the potentiation of the recombinant toxin is a consequence of its gene translocation and spreading in the body of the baculovirus-infected insect. The spreading is performed through (i) the infection of existing tracheal epithelia, (ii) the branching of newly formed trachea from infected tracheoblasts, and (iii) the local release of the toxin from infected tracheal epithelia to their close surroundings in either the peripheral or the central nervous system.

We are grateful to the late Professor S. Maeda for providing the silkworm viruses and Mrs N. Feinstein and Dr L. Fishman for technical support in the EM studies. This work was supported by a grant of the Binational Agricultural Research and Development Foundation (BARD, IS2465-94) to E.Z.

## References

- Barrett, J. W., Brownwright, A. J., Primavera, M. J. and Palli, S. R. (1998). Studies of the nucleopolyhedrosis infection process in insect by using the green fluorescence protein as a reporter. *J. Virol.* **72**, 3377–3382.
- Castel, M., Belenky, M., Cohen, S., Otterson, O. P. and Storm-Mathisen, J. (1993). Glutamate-like immunoreactivity in retinal terminals of the mouse suprachiasmatic nucleus. *Eur. J. Neurosci.* **5**, 368–381.
- Cory, J. S., Hirst, M. L., Williams, T., Halls, R. S., Gouso, D., Carty, T. M., Possee, R. D., Cayley, P. J. and Bishop, D. H. L. (1994). Field trial of genetically improved baculovirus insecticide. *Nature* **370**, 138–140.
- D'Ajello, V., Zlotkin, E., Miranda, F., Lissitzky, S. and Bettini, S. (1972). The effect of scorpion venom and pure toxins on the cockroach central nervous system. *Toxicon* **10**, 399–404.
- Darbon, H., Zlotkin, E., Kopeyan, C., van Rietschoten, J. and Rochat, H. (1982). Covalent structure of the insect toxin of the North African scorpion *Androctonus australis* Hector. *Int. J. Pept. Protein Res.* **20**, 320–330.
- Engelhard, E. K., Kam-Morgan, L. N., Washburn, J. O. and Volkman, L. E. (1994). The insect tracheal system: a conduit for the systemic spread of *Autographa californica* M nuclear polyhedrosis virus. *Proc. Natl. Acad. Sci. USA* **91**, 3224–3227.
- Fishman, L., Herrmann, R., Gordon, D. and Zlotkin, E. (1997). Insect tolerance to a neurotoxic polypeptide: pharmacokinetic and pharmacodynamic aspects. *J. Exp. Biol.* **200**, 1115–1123.
- Fishman, L., Kagan, M. L. and Zlotkin, E. (1991). Accessibility of the insect nervous system to a neurotoxic polypeptide. *J. Exp. Zool.* **257**, 10–23.
- Gordon, D., Jover, E., Couraud, F. and Zlotkin, E. (1984). The binding of the insect selective neurotoxin (AaIT) from scorpion venom to locust synaptosomal membranes. *Biochim. Biophys. Acta* **778**, 349–358.
- Gordon, D., Moskowitz, H., Eitan, M., Warner, C., Catterall, W. A. and Zlotkin, E. (1992). Localization of receptor sites for insect-selective toxins on sodium channels by site-directed antibodies. *Biochemistry* **31**, 7622–7628.
- Gordon, D., Zlotkin, E. and Catterall, W. A. (1985). The binding of an insect selective neurotoxin and saxitoxin to insect neuronal membranes. *Biochim. Biophys. Acta* **821**, 130–136.
- Harpaz, I. and Zlotkin, E. (1965). A Nuclear-Polyhedrosis Virus of the Safflower Leaf Worm *Heliothis peltigera*. *Ann. Soc. Ent. Fr.* **4**, 963–972.
- Herrmann, R., Fishman, L. and Zlotkin, E. (1990). The tolerance of lepidopterous larvae to an insect selective neurotoxin. *Insect Biochem.* **20**, 625–637.
- Herrmann, R., Moskowitz, H., Zlotkin, E. and Hammock, B. D. (1995). Positive cooperativity among insecticidal scorpion neurotoxins. *Toxicon* **33**, 1099–1102.
- Hsu, S. M., Raine, L. and Fanger, H. (1981). A comparative study of the peroxidase-antiperoxidase method and an avidin-biotin complex method for studying polypeptide hormones with radioimmunoassay antibodies. *Am. J. Clin. Pathol.* **75**, 734–738.
- Kirkpatrick, B. A., Washburn, J. O., Engelhard, E. K. and Volkman, L. E. (1994). Primary infection of insect tracheae by *Autographa californica* M nuclear polyhedrosis virus. *Virology* **203**, 184–186.
- Lane, N. J. (1974). The organization of insect nervous system. In *Insect Neurobiology*, vol. 35 (ed. J. E. Treherne), pp. 1–71. Amsterdam: North-Holland Publishing Company.
- Maeda, S. (1989). Expression of foreign genes in insects using baculovirus vectors. *Ann. Rev. Entomol.* **34**, 351–372.
- Maeda, S., Volrath, S. L., Hanzlik, T. N., Harper, S. A., Majima, K., Maddox, D. W., Hammock, B. D. and Fowler, E. (1991). Insecticidal effects of an insect-specific neurotoxin expressed by a recombinant baculovirus. *Virology* **184**, 777–780.
- Marumoto, Y., Sato, Y., Fujiwara, H., Sakano, K., Saeki, Y., Agata, M., Furusawa, M. and Maeda, S. (1987). Hyperproduction of polyhedrin-IGF II fusion protein in silkworm larvae infected with recombinant *Bombyx mori* nuclear polyhedrosis virus. *J. Gen. Virol.* **68**, 2599–2606.
- McCutchen, B. F., Choudary, P. V., Crenshaw, R., Maddox, D., Kamita, S. G., Palekar, N., Volrath, S., Fowler, E., Hammock, B. D. and Maeda, S. (1991). Development of a recombinant baculovirus expressing an insect-selective neurotoxin: potential for pest control. *Biotechnology (NY)* **9**, 848–852.
- Neri, L., Bettini, S. and Frank, M. (1965). The effect of *Latrodectus mactans* *tredecimguttatus* venom on the endogenous activity of *Periplaneta americana* nerve cord. *Toxicon* **3**, 95–99.
- Pelhate, M. and Zlotkin, E. (1981). Voltage dependent slowing of the turn off of Na<sup>+</sup> current in the cockroach giant axon induced by the scorpion venom 'insect' toxin. *J. Physiol. Lond.* **319**, 30–31.
- Pelhate, M. and Zlotkin, E. (1982). Actions of insect toxin and other toxins derived from the venom of the scorpion *Androctonus australis* on isolated giant axons of the cockroach (*Periplaneta americana*). *J. Exp. Biol.* **97**, 67–77.
- Reed, L. J. and Muench, S. (1938). A simple method of estimating fifty-percent endpoint. *Am. J. Hyg.* **27**, 493–497.
- Roeder, K. D., Tozian, L. and Weiant, E. A. (1960). Endogenous nerve activity and behaviour in the mantis and cockroach. *J. Insect Physiol.* **4**, 45–52.
- Rothschild, M., Schlein, Y. and Ito, S. (1986). *A Color Atlas of Insect Tissues via the Flea*, pp. 184. Wolfe Publishing Ltd.
- Stewart, L. M., Hirst, M., Lopez Ferber, M., Merryweather, A. T., Cayley, P. J. and Possee, R. D. (1991). Construction of an improved baculovirus insecticide containing an insect-specific toxin gene. *Nature* **352**, 85–88.
- Tanada, Y. and Kaya, H. K. (1993). *Insect Pathology*, pp. 666. San Diego: Academic Press Inc.
- Vaitukaitis, J. L. (1981). Immunochemical techniques, part B. In *Methods in Enzymology*, Vol. 73 (ed. J. J. Lanson and H. V. Vunkis), pp. 46–52. New York: Academic Press.
- Walther, C., Zlotkin, E. and Rathmayer, W. (1976). Action of different toxins from the scorpion *Androctonus australis* on a locust nerve-muscle preparation. *J. Insect Physiol.* **22**, 1187–1194.
- Weeks, J. C. and Truman, J. W. (1984). Neural organization of peptide-activated ecdysis behaviors during the metamorphosis of *Manduca sexta*. *J. Comp. Physiol. A* **155**, 407–422.
- Zlotkin, E., Fraenkel, G., Miranda, F. and Lissitzky, S. (1971a). The effect of scorpion venom on blowfly larvae – a new method for the evaluation of scorpion venom potency. *Toxicon* **9**, 1–8.
- Zlotkin, E., Moskowitz, H., Herrmann, R., Pelhate, M. and Gordon, D. (1995). Insect sodium channel as a target for the insect-selective neurotoxins from scorpion venom. In *Molecular Action of Insecticides on Ion Channels* (ed. J. M. Clark), pp. 56–85. Washington DC: American Chemical Society.
- Zlotkin, E., Rochat, H., Kopeyan, M., Miranda, F. and Lissitzky, S. (1971b). Purification and properties of the insect toxin from the venom of the scorpion *Androctonus australis* Hector. *Biochimie* **53**, 1073–1078.
